# Supplementary material for: TargetRNA3: predicting prokaryotic RNA regulatory targets with machine learning
Source: PubMed Central journal article supplement (PMC10691042; doi:10.1186/s13059-023-03117-2), 2023-12-01
Supplement: 13059_2023_3117_MOESM1_ESM.pdf [file 13059_2023_3117_MOESM1_ESM.pdf]

## Supplementary Material

# TargetRNA3: Predicting prokaryotic RNA regulatory targets with machine learning

## Contents

- [Principal component analysis](#)
- [Fig. S1. Variance in data explained by principal components](#)
- [Fig. S2. Interaction data with respect to most significant principal components](#)
- [Fig. S3. Relationships to evinced interactions of select features used by TargetRNA3](#)
- [Table S1](#)
- [Table S2](#)
- [Table S3](#)
- [Table S4](#)
- [Table S5](#)

## **Principal Component Analysis**

To better understand the relationships between the 111 features, we performed a principal component analysis (PCA). Instead of representing points (sRNA and candidate target pairs) by their 111 feature values, we consider points with respect to 111 principal components, i.e., the eigenspace determined from the covariance matrix. We then remove principal components in order of increasing corresponding eigenvalues. Fig. S1 shows the percent of variance explained when different numbers of principal components (from 1 to 111) are used as the dimensionality of the points is decreased. The figure shows that the features are not independent of each other, for instance more than half of the variance in the data can be explained by fewer than 20 of the 111 principal components. This is unsurprising since so many features are related, e.g., a number of features capture some form of the strength of hybridization between the two RNA sequences. Fig. S2 shows the data points (sRNA and candidate target pairs) projected into a space defined by the two or three most significant principal components. Visually, there does not appear to be much separation between points corresponding to interactions and points corresponding to non-interactions in these low dimensional spaces. Ultimately, we did not further pursue the use of PCA because it requires calculating all 111 features, and some of the features are too computationally slow to calculate in real time for our purposes.

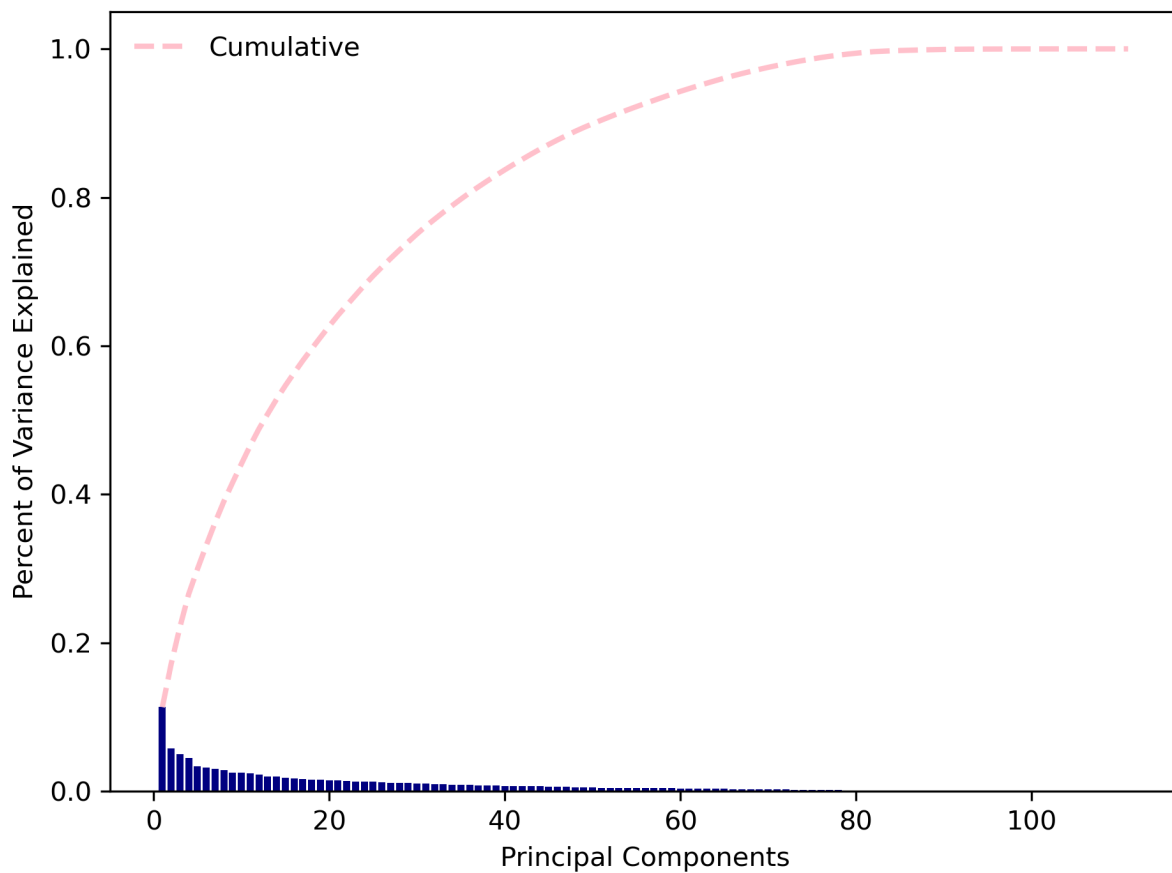

**Fig. S1. Variance in data explained by principal components.**

A principal component analysis was performed on the 111-dimensional data. The percent of variance explained by different principal components in decreasing significance (from left to right) is shown in the figure. The dashed line shows the cumulative percentage of variance explained by increasing numbers of principal components.

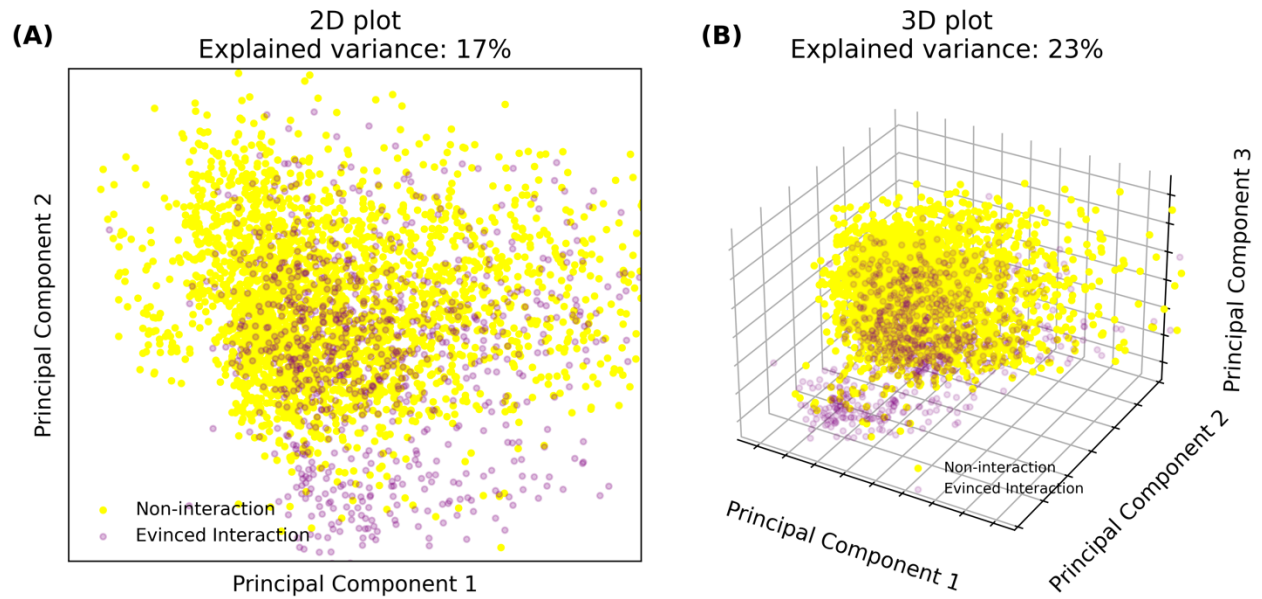

**Fig. S2. Interaction data with respect to most significant principal components.**

Following principal component analysis on the 111-dimensional data, possible sRNA:target interactions are plotted with respect to the two (A) or three (B) most significant principal components. Yellow points correspond to non-interactions and purple points correspond to interactions.

**(A)**

|                                                                   | F-statistic | p-value |
|-------------------------------------------------------------------|-------------|---------|
| Length of Target coding region                                    | 168.289     | 2.6e-38 |
| Upstream gene (same strand) overlaps target start codon           | 74.4711     | 6.7e-18 |
| Distance to upstream gene (same strand) from target start codon   | 5.83735     | 0.016   |
| Upstream gene (either strand) overlaps target start codon         | 80.5232     | 3.2e-19 |
| Distance to upstream gene (either strand) from target start codon | 29.7726     | 4.9e-08 |
| Are there sRNA:target homologs?                                   | 258.663     | 8.8e-58 |
| Number of sRNA:target homologs                                    | 1770.98     | 0       |
| Seed of length 7 bps                                              | 16.5912     | 4.7e-05 |
| RNAplex: energy considering accessibility                         | 137.318     | 1.4e-31 |

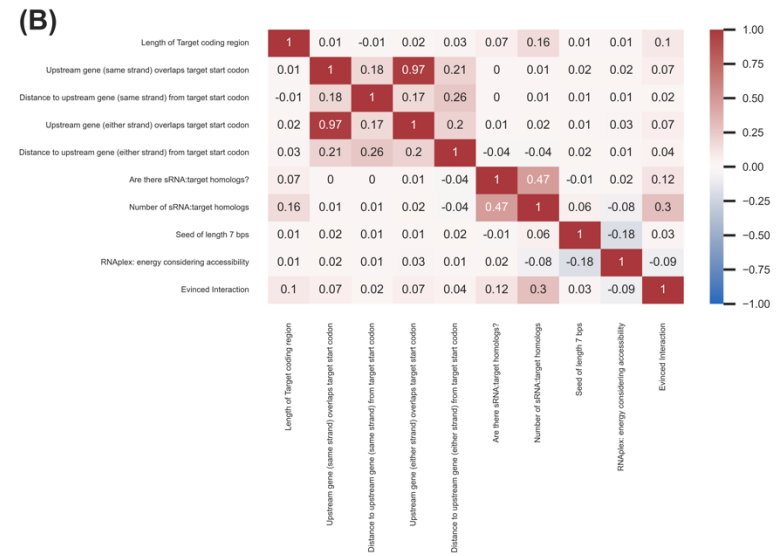

**Fig. S3. Relationships to evinced interactions of select features used by TargetRNA3.**

(A) The F-statistic and corresponding  $p$ -value, as calculated using analysis of variance, are shown for the 9 features used by TargetRNA3. Higher F-statistics and lower  $p$ -values (more darkly shaded regions in the figure) indicate how well the feature discriminates interactions from non-interactions. (B) The Pearson correlation coefficient is shown indicating the correlation of each of the 9 features used by TargetRNA3 with each of the other features used by TargetRNA3. The final row and column correspond to the correlation of each feature with whether interactions are evinced or not.

**Table S1.**

The table shows the phylum and class of the 13 genomes investigated in this study and the number of sRNAs from each genome.

| <b>Phylum</b>   | <b>Class</b>        | <b>Genome</b>                                                       | <b>Accession</b> | <b>Number of sRNAs</b> |
|-----------------|---------------------|---------------------------------------------------------------------|------------------|------------------------|
| Pseudomonadota  | Alphaproteobacteria | Agrobacterium fabrum str. C58                                       | GCF_000092025.1  | 1                      |
| Pseudomonadota  | Gammaproteobacteria | Azotobacter vinelandii DJ                                           | GCF_000021045.1  | 1                      |
| Bacillota       | Bacilli             | Bacillus subtilis subsp. subtilis str. 168                          | GCF_000009045.1  | 1                      |
| Pseudomonadota  | Gammaproteobacteria | Escherichia coli str. K-12 substr. MG1655                           | GCF_000005845.2  | 61                     |
| Actinomycetota  | Actinomycetes       | Mycobacterium tuberculosis H37Rv                                    | GCF_000195955.2  | 1                      |
| Pseudomonadota  | Gammaproteobacteria | Pasteurella multocida                                               | GCF_000006825.1  | 1                      |
| Pseudomonadota  | Gammaproteobacteria | Pseudomonas aeruginosa PAO1                                         | GCF_000006765.1  | 2                      |
| Pseudomonadota  | Gammaproteobacteria | Salmonella enterica subsp. enterica serovar Typhimurium str. 14028S | GCF_000022165.1  | 1                      |
| Pseudomonadota  | Gammaproteobacteria | Salmonella enterica subsp. enterica serovar Typhimurium str. LT2    | GCF_000006945.2  | 1                      |
| Pseudomonadota  | Gammaproteobacteria | Salmonella enterica subsp. enterica serovar Typhimurium str. SL1344 | GCF_000210855.2  | 2                      |
| Bacillota       | Bacilli             | Staphylococcus aureus subsp. aureus 6850                            | GCF_000462955.1  | 1                      |
| Cyanobacteriota | Cyanophyceae        | Synechocystis PCC 6803                                              | GCF_000009725.1  | 2                      |
| Pseudomonadota  | Gammaproteobacteria | Vibrio cholerae O1 biovar El Tor str. N16961                        | GCF_000006745.1  | 2                      |

**Table S2.**

The table, consisting of a large dataset (a CSV file approximately 340 MBs in size) with information on 329,548 possible sRNA:target interactions, is available at

<https://doi.org/10.7910/DVN/2Q8YRF>

**Table S3.**

The table provides a more detailed description of the 118 columns from the large dataset found in Table S2. The first five columns in Table S2 identify each sRNA and candidate target. The following 111 columns in Table S2 correspond to features that may be used for predicting whether a sRNA interacts with a candidate target. The penultimate column in Table S2 contains the probability that a sRNA and candidate target interact, as predicted by TargetRNA3. The final column in Table S2 indicates whether or not there is experimental evidence that a sRNA and candidate target interact. Features in the table below whose values were computed using an existing computational tool are indicated. The runtime to calculate each feature on a genome-wide scale is described in the table below as fast (generally requiring seconds or less), medium (generally requiring minutes), or slow (generally requiring one or more hours).

| #  | Column                                                            | Is Feature? | Computational Tool | Time to Compute | Description                                                                                                         |
|----|-------------------------------------------------------------------|-------------|--------------------|-----------------|---------------------------------------------------------------------------------------------------------------------|
| 1  | Genome                                                            |             |                    |                 | Name of genome                                                                                                      |
| 2  | sRNA Accession                                                    |             |                    |                 | Genomic accession of replicon where sRNA gene resides                                                               |
| 3  | sRNA                                                              |             |                    |                 | Name of sRNA                                                                                                        |
| 4  | Target Accession                                                  |             |                    |                 | Genomic accession of replicon where target gene resides                                                             |
| 5  | Target                                                            |             |                    |                 | Name of target                                                                                                      |
| 6  | Length of sRNA sequence                                           | Y           |                    | Fast            | Length of the sRNA sequence in nucleotides                                                                          |
| 7  | Length of Target coding region                                    | Y           |                    | Fast            | Length of the target sequence in nucleotides                                                                        |
| 8  | Upstream gene (same strand) overlaps target start codon           | Y           |                    | Fast            | Whether (1) or not (0) the upstream gene on the same strand overlaps the start of the target                        |
| 9  | Distance to upstream gene (same strand) from target start codon   | Y           |                    | Fast            | Distance in nucleotides from the start of the target to the upstream gene on the same strand                        |
| 10 | Upstream gene (either strand) overlaps target start codon         | Y           |                    | Fast            | Whether (1) or not (0) the upstream gene on the either strand overlaps the start of the target                      |
| 11 | Distance to upstream gene (either strand) from target start codon | Y           |                    | Fast            | Distance in nucleotides from the start of the target to the upstream gene on the either strand                      |
| 12 | Number of sRNA homologs (ALL)                                     | Y           |                    | Medium          | Number of sRNA homologs (max 100) when searching all reference and representative genomes in RefSeq                 |
| 13 | Number of target homologs (ALL)                                   | Y           |                    | Medium          | Number of target homologs (max 100) when searching all reference and representative genomes in RefSeq               |
| 14 | Are there sRNA:target homologs (ALL)?                             | Y           |                    | Medium          | Are there any sRNA and target homolog pairs when searching all reference and representative genomes in RefSeq?      |
| 15 | Number of sRNA:target homologs (ALL)                              | Y           |                    | Medium          | Number of sRNA and target homolog pairs (max 100) when searching all reference and representative genomes in RefSeq |



|    |                                                      |   |          |        |                                                                                                                        |
|----|------------------------------------------------------|---|----------|--------|------------------------------------------------------------------------------------------------------------------------|
| 16 | Number of sRNA homologs (16S relatives)              | Y |          | Fast   | Number of sRNA homologs (max 100) when searching 250 closest relatives as determined from 16S sequences                |
| 17 | Number of target homologs (16S relatives)            | Y |          | Fast   | Number of target homologs (max 10) when searching 250 closest relatives as determined from 16S sequences               |
| 18 | Are there sRNA:target homologs (16S relatives)?      | Y |          | Fast   | Are there any sRNA and target homolog pairs when searching 250 closest relatives as determined from 16S sequences?     |
| 19 | Number of sRNA:target homologs (16S relatives)       | Y |          | Fast   | Number of sRNA and target homolog pairs (max 10) when searching 250 closest relatives as determined from 16S sequences |
| 20 | Seed of length 7 bps                                 | Y |          | Fast   | Is there a seed of length 7 nucleotides, i.e., 7 consecutive basepairs between the sRNA and target sequences           |
| 21 | Seed of length 8 bps                                 | Y |          | Fast   | Is there a seed of length 8 nucleotides, i.e., 8 consecutive basepairs between the sRNA and target sequences           |
| 22 | Seed of length 9 bps                                 | Y |          | Fast   | Is there a seed of length 9 nucleotides, i.e., 9 consecutive basepairs between the sRNA and target sequences           |
| 23 | Seed of length 10 bps                                | Y |          | Fast   | Is there a seed of length 10 nucleotides, i.e., 10 consecutive basepairs between the sRNA and target sequences         |
| 24 | IntaRNA: is interaction found?                       | Y | IntaRNA  | Medium | Did IntaRNA report an interaction?                                                                                     |
| 25 | IntaRNA: energy                                      | Y | IntaRNA  | Medium | Energy associated with IntaRNA interaction                                                                             |
| 26 | IntaRNA: length of sRNA interacting region           | Y | IntaRNA  | Medium | Length of sRNA interacting region as reported by IntaRNA                                                               |
| 27 | IntaRNA: length of target interacting region         | Y | IntaRNA  | Medium | Length of target interacting region as reported by IntaRNA                                                             |
| 28 | IntaRNA: is interaction upstream of start codon?     | Y | IntaRNA  | Medium | Is interaction reported by IntaRNA upstream of the target start codon?                                                 |
| 29 | IntaRNA: distance of interaction from start codon    | Y | IntaRNA  | Medium | Distance in nucleotides from the start codon of the interaction reported by IntaRNA                                    |
| 30 | IntaRNA: number of AU bps                            | Y | IntaRNA  | Medium | Number of A:U basepairs in interaction reported by IntaRNA                                                             |
| 31 | IntaRNA: number of GC bps                            | Y | IntaRNA  | Medium | Number of G:C basepairs in interaction reported by IntaRNA                                                             |
| 32 | IntaRNA: number of GU basepairs                      | Y | IntaRNA  | Medium | Number of G:U basepairs in interaction reported by IntaRNA                                                             |
| 33 | IntaRNA: total number of bps                         | Y | IntaRNA  | Medium | Number of all basepairs in interaction reported by IntaRNA                                                             |
| 34 | IntaRNA: number of stacking regions                  | Y | IntaRNA  | Medium | Number of stacking regions in interaction reported by IntaRNA                                                          |
| 35 | IntaRNA: length of largest stacking region           | Y | IntaRNA  | Medium | Number of nucleotides in largest stacking region in interaction reported by IntaRNA                                    |
| 36 | IntaRNA: length of largest canonical stacking region | Y | IntaRNA  | Medium | Number of nucleotides in largest canonical stacking region in interaction reported by IntaRNA                          |
| 37 | IntaRNA: total length of interior loops              | Y | IntaRNA  | Medium | Number of nucleotides in all interior loops in interaction reported by IntaRNA                                         |
| 38 | IntaRNA: number of interior loops                    | Y | IntaRNA  | Medium | Number of interior loops in interaction reported by IntaRNA                                                            |
| 39 | IntaRNA: length of largest interior loop             | Y | IntaRNA  | Medium | Number of nucleotides in largest interior loop in interaction reported by IntaRNA                                      |
| 40 | IntaRNA: total length of bulge loops                 | Y | IntaRNA  | Medium | Number of nucleotides in all bulge loops in interaction reported by IntaRNA                                            |
| 41 | IntaRNA: number of bulge loops                       | Y | IntaRNA  | Medium | Number of bulge loops in interaction reported by IntaRNA                                                               |
| 42 | IntaRNA: length of largest bulge loop                | Y | IntaRNA  | Medium | Number of nucleotides in largest bulge loop in interaction reported by IntaRNA                                         |
| 43 | CopraRNA: p-value                                    | Y | CopraRNA | Slow   | P-value of interaction reported by CopraRNA                                                                            |
| 44 | CopraRNA: false-discovery-rate                       | Y | CopraRNA | Slow   | False-discovery-rate of interaction reported by CopraRNA                                                               |



|     |                         |   |              |      |                                                                                            |
|-----|-------------------------|---|--------------|------|--------------------------------------------------------------------------------------------|
| 90  | GCC                     | Y | sRNARFTarget | Fast | Difference in frequency of trinucleotide between the target sequence and the sRNA sequence |
| 91  | GCG                     | Y | sRNARFTarget | Fast | Difference in frequency of trinucleotide between the target sequence and the sRNA sequence |
| 92  | GCT                     | Y | sRNARFTarget | Fast | Difference in frequency of trinucleotide between the target sequence and the sRNA sequence |
| 93  | GGA                     | Y | sRNARFTarget | Fast | Difference in frequency of trinucleotide between the target sequence and the sRNA sequence |
| 94  | GGC                     | Y | sRNARFTarget | Fast | Difference in frequency of trinucleotide between the target sequence and the sRNA sequence |
| 95  | GGG                     | Y | sRNARFTarget | Fast | Difference in frequency of trinucleotide between the target sequence and the sRNA sequence |
| 96  | GGT                     | Y | sRNARFTarget | Fast | Difference in frequency of trinucleotide between the target sequence and the sRNA sequence |
| 97  | GTA                     | Y | sRNARFTarget | Fast | Difference in frequency of trinucleotide between the target sequence and the sRNA sequence |
| 98  | GTC                     | Y | sRNARFTarget | Fast | Difference in frequency of trinucleotide between the target sequence and the sRNA sequence |
| 99  | GTG                     | Y | sRNARFTarget | Fast | Difference in frequency of trinucleotide between the target sequence and the sRNA sequence |
| 100 | GTT                     | Y | sRNARFTarget | Fast | Difference in frequency of trinucleotide between the target sequence and the sRNA sequence |
| 101 | TAA                     | Y | sRNARFTarget | Fast | Difference in frequency of trinucleotide between the target sequence and the sRNA sequence |
| 102 | TAC                     | Y | sRNARFTarget | Fast | Difference in frequency of trinucleotide between the target sequence and the sRNA sequence |
| 103 | TAG                     | Y | sRNARFTarget | Fast | Difference in frequency of trinucleotide between the target sequence and the sRNA sequence |
| 104 | TAT                     | Y | sRNARFTarget | Fast | Difference in frequency of trinucleotide between the target sequence and the sRNA sequence |
| 105 | TCA                     | Y | sRNARFTarget | Fast | Difference in frequency of trinucleotide between the target sequence and the sRNA sequence |
| 106 | TCC                     | Y | sRNARFTarget | Fast | Difference in frequency of trinucleotide between the target sequence and the sRNA sequence |
| 107 | TCG                     | Y | sRNARFTarget | Fast | Difference in frequency of trinucleotide between the target sequence and the sRNA sequence |
| 108 | TCT                     | Y | sRNARFTarget | Fast | Difference in frequency of trinucleotide between the target sequence and the sRNA sequence |
| 109 | TGA                     | Y | sRNARFTarget | Fast | Difference in frequency of trinucleotide between the target sequence and the sRNA sequence |
| 110 | TGC                     | Y | sRNARFTarget | Fast | Difference in frequency of trinucleotide between the target sequence and the sRNA sequence |
| 111 | TGG                     | Y | sRNARFTarget | Fast | Difference in frequency of trinucleotide between the target sequence and the sRNA sequence |
| 112 | TGT                     | Y | sRNARFTarget | Fast | Difference in frequency of trinucleotide between the target sequence and the sRNA sequence |
| 113 | TTA                     | Y | sRNARFTarget | Fast | Difference in frequency of trinucleotide between the target sequence and the sRNA sequence |
| 114 | TTC                     | Y | sRNARFTarget | Fast | Difference in frequency of trinucleotide between the target sequence and the sRNA sequence |
| 115 | TTG                     | Y | sRNARFTarget | Fast | Difference in frequency of trinucleotide between the target sequence and the sRNA sequence |
| 116 | TTT                     | Y | sRNARFTarget | Fast | Difference in frequency of trinucleotide between the target sequence and the sRNA sequence |
| 117 | TargetRNA3: probability |   | TargetRNA3   | Fast | Probability of sRNA and target interaction as reported by TargetRNA3                       |
| 118 | Evinced Interaction     |   |              |      | Is there experimental evidence for an interaction between the sRNA and target?             |

**Table S4.**

The table indicates the performance of 8 different machine learning algorithms using different measures: area under the ROC curve (AUC), F1 score (F1), Matthews correlation coefficient (MCC), sensitivity at a false positive rate of 5%, and the time in seconds required for training the machine learning model.

| <b>Algorithm</b>                | <b>AUC</b> | <b>F1</b> | <b>MCC</b> | <b>Sensitivity at 5% False Positive Rate</b> | <b>Training Time (in seconds)</b> |
|---------------------------------|------------|-----------|------------|----------------------------------------------|-----------------------------------|
| Gradient Boosting               | 0.75       | 0.35      | 0.28       | 0.22                                         | 1                                 |
| Random Forest                   | 0.74       | 0.32      | 0.25       | 0.21                                         | 1                                 |
| Neural Network                  | 0.72       | 0.21      | 0.18       | 0.16                                         | 6                                 |
| Quadratic Discriminant Analysis | 0.68       | 0.39      | 0.21       | 0.11                                         | 0                                 |
| Gaussian Naive Bayes            | 0.67       | 0.39      | 0.22       | 0.11                                         | 0                                 |
| k Nearest Neighbors             | 0.66       | 0.36      | 0.20       | 0.13                                         | 0                                 |
| Logistic Regression             | 0.65       | 0.16      | 0.15       | 0.13                                         | 0                                 |
| Support Vector Machine          | 0.65       | 0.18      | 0.23       | 0.15                                         | 48                                |

**Table S5.**

The table indicates the performance of 6 different tools for predicting targets of sRNA regulation.

| <b>Tool</b>  | <b>AUC</b> | <b>Sensitivity at 5%<br/>False Positive Rate</b> | <b>Average Runtime<br/>per sRNA (minutes)</b> |
|--------------|------------|--------------------------------------------------|-----------------------------------------------|
| TargetRNA3   | 0.68       | 0.18                                             | < 1                                           |
| CopraRNA     | 0.64       | 0.16                                             | 189                                           |
| RNAup        | 0.59       | 0.11                                             | 47                                            |
| IntaRNA      | 0.57       | 0.08                                             | 3.5                                           |
| sRNARFTarget | 0.56       | 0.06                                             | < 1                                           |
| RNAplex      | 0.55       | 0.06                                             | < 1                                           |
